# Supplementary material
Source: Springer Nature journal article supplement (https://www.springermedizin.de/resource/supplementary/12873_2013_200_MOESM3_ESM.pdf/9431678)
Supplement: MOESM3 [file 9431678]

60

(53) (73)

65

(68) (64)
